# Supplementary material for: Multiple microRNAs as biomarkers for early breast cancer diagnosis
Source: PubMed Central journal article supplement — Mol Clin Oncol. 2020 Dec 17;14(2):31. doi: 10.3892/mco.2020.2193 (PMC7783718; doi:10.3892/mco.2020.2193), 2020-12-17
Supplement: Supplementary_Data.pdf [file Supplementary_Data.pdf]

Table SI. RF model analysis result including 2 combinations of nine miRNAs.

| Biomarker | 1        | 2        | 3 | 4 | Training set AUC | Validation set AUC |
|-----------|----------|----------|---|---|------------------|--------------------|
| 1         | miR-223  | miR-1246 |   |   | 0.983            | 0.984              |
| 2         | miR-223  | miR-206  |   |   | 0.991            | 0.979              |
| 3         | miR-223  | miR-24   |   |   | 0.994            | 0.985              |
| 4         | miR-223  | miR-373  |   |   | 0.975            | 0.967              |
| 5         | miR-223  | miR-21   |   |   | 0.986            | 0.962              |
| 6         | miR-223  | miR-6875 |   |   | 0.989            | 0.971              |
| 7         | miR-223  | miR-202  |   |   | 0.968            | 0.959              |
| 8         | miR-223  | miR-219B |   |   | 0.976            | 0.959              |
| 9         | miR-1246 | miR-206  |   |   | 0.979            | 0.988              |
| 10        | miR-1246 | miR-24   |   |   | 0.984            | 0.987              |
| 11        | miR-1246 | miR-373  |   |   | 0.968            | 0.983              |
| 12        | miR-1246 | miR-21   |   |   | 0.973            | 0.976              |
| 13        | miR-1246 | miR-6875 |   |   | 0.991            | 0.984              |
| 14        | miR-1246 | miR-202  |   |   | 0.959            | 0.966              |
| 15        | miR-1246 | miR-219B |   |   | 0.963            | 0.964              |
| 16        | miR-206  | miR-24   |   |   | 0.976            | 0.973              |
| 17        | miR-206  | miR-373  |   |   | 0.964            | 0.981              |
| 18        | miR-206  | miR-21   |   |   | 0.979            | 0.973              |
| 19        | miR-206  | miR-6875 |   |   | 0.966            | 0.969              |
| 20        | miR-206  | miR-202  |   |   | 0.956            | 0.971              |
| 21        | miR-206  | miR-219B |   |   | 0.942            | 0.933              |
| 22        | miR-24   | miR-373  |   |   | 0.982            | 0.977              |
| 23        | miR-24   | miR-21   |   |   | 0.985            | 0.988              |
| 24        | miR-24   | miR-6875 |   |   | 0.989            | 0.987              |
| 25        | miR-24   | miR-202  |   |   | 0.973            | 0.969              |
| 26        | miR-24   | miR-219B |   |   | 0.963            | 0.96               |
| 27        | miR-373  | miR-21   |   |   | 0.96             | 0.973              |
| 28        | miR-373  | miR-6875 |   |   | 0.957            | 0.964              |
| 29        | miR-373  | miR-202  |   |   | 0.934            | 0.956              |
| 30        | miR-373  | miR-219B |   |   | 0.94             | 0.95               |
| 31        | miR-21   | miR-6875 |   |   | 0.97             | 0.969              |
| 32        | miR-21   | miR-202  |   |   | 0.956            | 0.944              |
| 33        | miR-21   | miR-219B |   |   | 0.927            | 0.933              |
| 34        | miR-6875 | miR-202  |   |   | 0.972            | 0.938              |
| 35        | miR-6875 | miR-219B |   |   | 0.915            | 0.94               |
| 36        | miR-202  | miR-219B |   |   | 0.938            | 0.914              |

Table SII. RF model analysis result including 3 combinations of nine miRNAs.

| Biomarker | 1        | 2        | 3        | 4 | Training set AUC | Validation set AUC |
|-----------|----------|----------|----------|---|------------------|--------------------|
| 1         | miR-223  | miR-1246 | miR-206  |   | 0.991            | 0.992              |
| 2         | miR-223  | miR-1246 | miR-24   |   | 0.997            | 0.99               |
| 3         | miR-223  | miR-1246 | miR-373  |   | 0.986            | 0.986              |
| 4         | miR-223  | miR-1246 | miR-21   |   | 0.987            | 0.985              |
| 5         | miR-223  | miR-1246 | miR-6875 |   | 0.994            | 0.986              |
| 6         | miR-223  | miR-1246 | miR-202  |   | 0.981            | 0.983              |
| 7         | miR-223  | miR-1246 | miR-219B |   | 0.99             | 0.982              |
| 8         | miR-223  | miR-206  | miR-24   |   | 0.998            | 0.992              |
| 9         | miR-223  | miR-206  | miR-373  |   | 0.99             | 0.985              |
| 10        | miR-223  | miR-206  | miR-21   |   | 0.993            | 0.979              |
| 11        | miR-223  | miR-206  | miR-6875 |   | 0.993            | 0.983              |
| 12        | miR-223  | miR-206  | miR-202  |   | 0.988            | 0.982              |
| 13        | miR-223  | miR-206  | miR-219B |   | 0.988            | 0.974              |
| 14        | miR-223  | miR-24   | miR-373  |   | 0.995            | 0.986              |
| 15        | miR-223  | miR-24   | miR-21   |   | 0.998            | 0.989              |
| 16        | miR-223  | miR-24   | miR-6875 |   | 0.998            | 0.99               |
| 17        | miR-223  | miR-24   | miR-202  |   | 0.991            | 0.981              |
| 18        | miR-223  | miR-24   | miR-219B |   | 0.997            | 0.982              |
| 19        | miR-223  | miR-373  | miR-21   |   | 0.99             | 0.974              |
| 20        | miR-223  | miR-373  | miR-6875 |   | 0.988            | 0.977              |
| 21        | miR-223  | miR-373  | miR-202  |   | 0.976            | 0.966              |
| 22        | miR-223  | miR-373  | miR-219B |   | 0.981            | 0.971              |
| 23        | miR-223  | miR-21   | miR-6875 |   | 0.99             | 0.977              |
| 24        | miR-223  | miR-21   | miR-202  |   | 0.98             | 0.968              |
| 25        | miR-223  | miR-21   | miR-219B |   | 0.986            | 0.958              |
| 26        | miR-223  | miR-6875 | miR-202  |   | 0.989            | 0.97               |
| 27        | miR-223  | miR-6875 | miR-219B |   | 0.984            | 0.965              |
| 28        | miR-223  | miR-202  | miR-219B |   | 0.976            | 0.957              |
| 29        | miR-1246 | miR-206  | miR-24   |   | 0.991            | 0.994              |
| 30        | miR-1246 | miR-206  | miR-373  |   | 0.985            | 0.991              |
| 31        | miR-1246 | miR-206  | miR-21   |   | 0.988            | 0.988              |
| 32        | miR-1246 | miR-206  | miR-6875 |   | 0.992            | 0.993              |
| 33        | miR-1246 | miR-206  | miR-202  |   | 0.978            | 0.987              |
| 34        | miR-1246 | miR-206  | miR-219B |   | 0.987            | 0.984              |
| 35        | miR-1246 | miR-24   | miR-373  |   | 0.99             | 0.989              |
| 36        | miR-1246 | miR-24   | miR-21   |   | 0.989            | 0.993              |
| 37        | miR-1246 | miR-24   | miR-6875 |   | 0.997            | 0.992              |
| 38        | miR-1246 | miR-24   | miR-202  |   | 0.987            | 0.987              |
| 39        | miR-1246 | miR-24   | miR-219B |   | 0.989            | 0.988              |
| 40        | miR-1246 | miR-373  | miR-21   |   | 0.977            | 0.984              |
| 41        | miR-1246 | miR-373  | miR-6875 |   | 0.988            | 0.989              |
| 42        | miR-1246 | miR-373  | miR-202  |   | 0.973            | 0.983              |
| 43        | miR-1246 | miR-373  | miR-219B |   | 0.976            | 0.981              |
| 44        | miR-1246 | miR-21   | miR-6875 |   | 0.989            | 0.989              |
| 45        | miR-1246 | miR-21   | miR-202  |   | 0.974            | 0.979              |
| 46        | miR-1246 | miR-21   | miR-219B |   | 0.97             | 0.978              |
| 47        | miR-1246 | miR-6875 | miR-202  |   | 0.988            | 0.984              |
| 48        | miR-1246 | miR-6875 | miR-219B |   | 0.989            | 0.987              |
| 49        | miR-1246 | miR-202  | miR-219B |   | 0.975            | 0.971              |
| 50        | miR-206  | miR-24   | miR-373  |   | 0.989            | 0.987              |
| 51        | miR-206  | miR-24   | miR-21   |   | 0.994            | 0.992              |
| 52        | miR-206  | miR-24   | miR-6875 |   | 0.991            | 0.987              |
| 53        | miR-206  | miR-24   | miR-202  |   | 0.987            | 0.987              |
| 54        | miR-206  | miR-24   | miR-219B |   | 0.976            | 0.977              |
| 55        | miR-206  | miR-373  | miR-21   |   | 0.983            | 0.984              |
| 56        | miR-206  | miR-373  | miR-6875 |   | 0.976            | 0.984              |
| 57        | miR-206  | miR-373  | miR-202  |   | 0.969            | 0.984              |
| 58        | miR-206  | miR-373  | miR-219B |   | 0.972            | 0.975              |
| 59        | miR-206  | miR-21   | miR-6875 |   | 0.982            | 0.986              |

Table SII. Continued.

| Biomarker | 1        | 2        | 3        | 4 | Training set AUC | Validation set AUC |
|-----------|----------|----------|----------|---|------------------|--------------------|
| 60        | miR-206  | miR-21   | miR-202  |   | 0.979            | 0.975              |
| 61        | miR-206  | miR-21   | miR-219B |   | 0.973            | 0.966              |
| 62        | miR-206  | miR-6875 | miR-202  |   | 0.983            | 0.979              |
| 63        | miR-206  | miR-6875 | miR-219B |   | 0.968            | 0.967              |
| 64        | miR-206  | miR-202  | miR-219B |   | 0.966            | 0.959              |
| 65        | miR-24   | miR-373  | miR-21   |   | 0.988            | 0.992              |
| 66        | miR-24   | miR-373  | miR-6875 |   | 0.991            | 0.983              |
| 67        | miR-24   | miR-373  | miR-202  |   | 0.981            | 0.979              |
| 68        | miR-24   | miR-373  | miR-219B |   | 0.985            | 0.977              |
| 69        | miR-24   | miR-21   | miR-6875 |   | 0.992            | 0.991              |
| 70        | miR-24   | miR-21   | miR-202  |   | 0.987            | 0.985              |
| 71        | miR-24   | miR-21   | miR-219B |   | 0.986            | 0.982              |
| 72        | miR-24   | miR-6875 | miR-202  |   | 0.992            | 0.984              |
| 73        | miR-24   | miR-6875 | miR-219B |   | 0.986            | 0.983              |
| 74        | miR-24   | miR-202  | miR-219B |   | 0.985            | 0.969              |
| 75        | miR-373  | miR-21   | miR-6875 |   | 0.975            | 0.983              |
| 76        | miR-373  | miR-21   | miR-202  |   | 0.967            | 0.966              |
| 77        | miR-373  | miR-21   | miR-219B |   | 0.965            | 0.972              |
| 78        | miR-373  | miR-6875 | miR-202  |   | 0.966            | 0.967              |
| 79        | miR-373  | miR-6875 | miR-219B |   | 0.962            | 0.972              |
| 80        | miR-373  | miR-202  | miR-219B |   | 0.951            | 0.954              |
| 81        | miR-21   | miR-6875 | miR-202  |   | 0.98             | 0.969              |
| 82        | miR-21   | miR-6875 | miR-219B |   | 0.964            | 0.965              |
| 83        | miR-21   | miR-202  | miR-219B |   | 0.965            | 0.952              |
| 84        | miR-6875 | miR-202  | miR-219B |   | 0.973            | 0.952              |

Table III. RF model analysis result including 4 combinations of nine miRNAs.

| Biomarker | 1        | 2        | 3        | 4        | Training set AUC | Validation set AUC |
|-----------|----------|----------|----------|----------|------------------|--------------------|
| 1         | miR-223  | miR-1246 | miR-206  | miR-24   | 0.997            | 0.994              |
| 2         | miR-223  | miR-1246 | miR-206  | miR-373  | 0.991            | 0.993              |
| 3         | miR-223  | miR-1246 | miR-206  | miR-21   | 0.993            | 0.992              |
| 4         | miR-223  | miR-1246 | miR-206  | miR-6875 | 0.995            | 0.991              |
| 5         | miR-223  | miR-1246 | miR-206  | miR-202  | 0.989            | 0.99               |
| 6         | miR-223  | miR-1246 | miR-206  | miR-219B | 0.991            | 0.989              |
| 7         | miR-223  | miR-1246 | miR-24   | miR-373  | 0.997            | 0.99               |
| 8         | miR-223  | miR-1246 | miR-24   | miR-21   | 0.997            | 0.989              |
| 9         | miR-223  | miR-1246 | miR-24   | miR-6875 | 0.999            | 0.991              |
| 10        | miR-223  | miR-1246 | miR-24   | miR-202  | 0.996            | 0.989              |
| 11        | miR-223  | miR-1246 | miR-24   | miR-219B | 0.998            | 0.988              |
| 12        | miR-223  | miR-1246 | miR-373  | miR-21   | 0.986            | 0.985              |
| 13        | miR-223  | miR-1246 | miR-373  | miR-6875 | 0.993            | 0.988              |
| 14        | miR-223  | miR-1246 | miR-373  | miR-202  | 0.984            | 0.986              |
| 15        | miR-223  | miR-1246 | miR-373  | miR-219B | 0.991            | 0.986              |
| 16        | miR-223  | miR-1246 | miR-21   | miR-6875 | 0.993            | 0.986              |
| 17        | miR-223  | miR-1246 | miR-21   | miR-202  | 0.986            | 0.986              |
| 18        | miR-223  | miR-1246 | miR-21   | miR-219B | 0.991            | 0.984              |
| 19        | miR-223  | miR-1246 | miR-6875 | miR-202  | 0.991            | 0.985              |
| 20        | miR-223  | miR-1246 | miR-6875 | miR-219B | 0.994            | 0.986              |
| 21        | miR-223  | miR-1246 | miR-202  | miR-219B | 0.987            | 0.983              |
| 22        | miR-223  | miR-206  | miR-24   | miR-373  | 0.998            | 0.99               |
| 23        | miR-223  | miR-206  | miR-24   | miR-21   | 0.999            | 0.993              |
| 24        | miR-223  | miR-206  | miR-24   | miR-6875 | 0.998            | 0.993              |
| 25        | miR-223  | miR-206  | miR-24   | miR-202  | 0.997            | 0.992              |
| 26        | miR-223  | miR-206  | miR-24   | miR-219B | 0.998            | 0.989              |
| 27        | miR-223  | miR-206  | miR-373  | miR-21   | 0.993            | 0.981              |
| 28        | miR-223  | miR-206  | miR-373  | miR-6875 | 0.991            | 0.984              |
| 29        | miR-223  | miR-206  | miR-373  | miR-202  | 0.99             | 0.984              |
| 30        | miR-223  | miR-206  | miR-373  | miR-219B | 0.99             | 0.984              |
| 31        | miR-223  | miR-206  | miR-21   | miR-6875 | 0.993            | 0.987              |
| 32        | miR-223  | miR-206  | miR-21   | miR-202  | 0.991            | 0.981              |
| 33        | miR-223  | miR-206  | miR-21   | miR-219B | 0.992            | 0.976              |
| 34        | miR-223  | miR-206  | miR-6875 | miR-202  | 0.994            | 0.983              |
| 35        | miR-223  | miR-206  | miR-6875 | miR-219B | 0.991            | 0.979              |
| 36        | miR-223  | miR-206  | miR-202  | miR-219B | 0.988            | 0.98               |
| 37        | miR-223  | miR-24   | miR-373  | miR-21   | 0.997            | 0.988              |
| 38        | miR-223  | miR-24   | miR-373  | miR-6875 | 0.996            | 0.99               |
| 39        | miR-223  | miR-24   | miR-373  | miR-202  | 0.993            | 0.983              |
| 40        | miR-223  | miR-24   | miR-373  | miR-219B | 0.996            | 0.982              |
| 41        | miR-223  | miR-24   | miR-21   | miR-6875 | 0.998            | 0.989              |
| 42        | miR-223  | miR-24   | miR-21   | miR-202  | 0.996            | 0.985              |
| 43        | miR-223  | miR-24   | miR-21   | miR-219B | 0.997            | 0.985              |
| 44        | miR-223  | miR-24   | miR-6875 | miR-202  | 0.996            | 0.987              |
| 45        | miR-223  | miR-24   | miR-6875 | miR-219B | 0.997            | 0.988              |
| 46        | miR-223  | miR-24   | miR-202  | miR-219B | 0.995            | 0.979              |
| 47        | miR-223  | miR-373  | miR-21   | miR-6875 | 0.989            | 0.978              |
| 48        | miR-223  | miR-373  | miR-21   | miR-202  | 0.983            | 0.972              |
| 49        | miR-223  | miR-373  | miR-21   | miR-219B | 0.988            | 0.975              |
| 50        | miR-223  | miR-373  | miR-6875 | miR-202  | 0.987            | 0.974              |
| 51        | miR-223  | miR-373  | miR-6875 | miR-219B | 0.988            | 0.974              |
| 52        | miR-223  | miR-373  | miR-202  | miR-219B | 0.978            | 0.967              |
| 53        | miR-223  | miR-21   | miR-6875 | miR-202  | 0.988            | 0.975              |
| 54        | miR-223  | miR-21   | miR-6875 | miR-219B | 0.991            | 0.972              |
| 55        | miR-223  | miR-21   | miR-202  | miR-219B | 0.983            | 0.967              |
| 56        | miR-223  | miR-6875 | miR-202  | miR-219B | 0.989            | 0.966              |
| 57        | miR-1246 | miR-206  | miR-24   | miR-373  | 0.993            | 0.992              |
| 58        | miR-1246 | miR-206  | miR-24   | miR-21   | 0.995            | 0.996              |
| 59        | miR-1246 | miR-206  | miR-24   | miR-6875 | 0.997            | 0.996              |

Table III. Continued.

| Biomarker | 1        | 2        | 3        | 4        | Training set AUC | Validation set AUC |
|-----------|----------|----------|----------|----------|------------------|--------------------|
| 60        | miR-1246 | miR-206  | miR-24   | miR-202  | 0.991            | 0.995              |
| 61        | miR-1246 | miR-206  | miR-24   | miR-219B | 0.993            | 0.992              |
| 62        | miR-1246 | miR-206  | miR-373  | miR-21   | 0.987            | 0.99               |
| 63        | miR-1246 | miR-206  | miR-373  | miR-6875 | 0.99             | 0.995              |
| 64        | miR-1246 | miR-206  | miR-373  | miR-202  | 0.982            | 0.99               |
| 65        | miR-1246 | miR-206  | miR-373  | miR-219B | 0.987            | 0.988              |
| 66        | miR-1246 | miR-206  | miR-21   | miR-6875 | 0.992            | 0.996              |
| 67        | miR-1246 | miR-206  | miR-21   | miR-202  | 0.988            | 0.988              |
| 68        | miR-1246 | miR-206  | miR-21   | miR-219B | 0.987            | 0.985              |
| 69        | miR-1246 | miR-206  | miR-6875 | miR-202  | 0.99             | 0.994              |
| 70        | miR-1246 | miR-206  | miR-6875 | miR-219B | 0.992            | 0.994              |
| 71        | miR-1246 | miR-206  | miR-202  | miR-219B | 0.983            | 0.986              |
| 72        | miR-1246 | miR-24   | miR-373  | miR-21   | 0.992            | 0.991              |
| 73        | miR-1246 | miR-24   | miR-373  | miR-6875 | 0.996            | 0.992              |
| 74        | miR-1246 | miR-24   | miR-373  | miR-202  | 0.991            | 0.988              |
| 75        | miR-1246 | miR-24   | miR-373  | miR-219B | 0.992            | 0.987              |
| 76        | miR-1246 | miR-24   | miR-21   | miR-6875 | 0.997            | 0.995              |
| 77        | miR-1246 | miR-24   | miR-21   | miR-202  | 0.991            | 0.99               |
| 78        | miR-1246 | miR-24   | miR-21   | miR-219B | 0.99             | 0.99               |
| 79        | miR-1246 | miR-24   | miR-6875 | miR-202  | 0.996            | 0.991              |
| 80        | miR-1246 | miR-24   | miR-6875 | miR-219B | 0.997            | 0.99               |
| 81        | miR-1246 | miR-24   | miR-202  | miR-219B | 0.991            | 0.985              |
| 82        | miR-1246 | miR-373  | miR-21   | miR-6875 | 0.987            | 0.991              |
| 83        | miR-1246 | miR-373  | miR-21   | miR-202  | 0.979            | 0.982              |
| 84        | miR-1246 | miR-373  | miR-21   | miR-219B | 0.979            | 0.984              |
| 85        | miR-1246 | miR-373  | miR-6875 | miR-202  | 0.987            | 0.99               |
| 86        | miR-1246 | miR-373  | miR-6875 | miR-219B | 0.988            | 0.99               |
| 87        | miR-1246 | miR-373  | miR-202  | miR-219B | 0.977            | 0.983              |
| 88        | miR-1246 | miR-21   | miR-6875 | miR-202  | 0.988            | 0.989              |
| 89        | miR-1246 | miR-21   | miR-6875 | miR-219B | 0.987            | 0.988              |
| 90        | miR-1246 | miR-21   | miR-202  | miR-219B | 0.978            | 0.979              |
| 91        | miR-1246 | miR-6875 | miR-202  | miR-219B | 0.989            | 0.985              |
| 92        | miR-206  | miR-24   | miR-373  | miR-21   | 0.992            | 0.994              |
| 93        | miR-206  | miR-24   | miR-373  | miR-6875 | 0.994            | 0.99               |
| 94        | miR-206  | miR-24   | miR-373  | miR-202  | 0.988            | 0.99               |
| 95        | miR-206  | miR-24   | miR-373  | miR-219B | 0.99             | 0.985              |
| 96        | miR-206  | miR-24   | miR-21   | miR-6875 | 0.993            | 0.993              |
| 97        | miR-206  | miR-24   | miR-21   | miR-202  | 0.992            | 0.993              |
| 98        | miR-206  | miR-24   | miR-21   | miR-219B | 0.993            | 0.988              |
| 99        | miR-206  | miR-24   | miR-6875 | miR-202  | 0.994            | 0.991              |
| 100       | miR-206  | miR-24   | miR-6875 | miR-219B | 0.989            | 0.987              |
| 101       | miR-206  | miR-24   | miR-202  | miR-219B | 0.987            | 0.981              |
| 102       | miR-206  | miR-373  | miR-21   | miR-6875 | 0.983            | 0.99               |
| 103       | miR-206  | miR-373  | miR-21   | miR-202  | 0.98             | 0.981              |
| 104       | miR-206  | miR-373  | miR-21   | miR-219B | 0.982            | 0.979              |
| 105       | miR-206  | miR-373  | miR-6875 | miR-202  | 0.977            | 0.985              |
| 106       | miR-206  | miR-373  | miR-6875 | miR-219B | 0.977            | 0.979              |
| 107       | miR-206  | miR-373  | miR-202  | miR-219B | 0.972            | 0.978              |
| 108       | miR-206  | miR-21   | miR-6875 | miR-202  | 0.983            | 0.986              |
| 109       | miR-206  | miR-21   | miR-6875 | miR-219B | 0.981            | 0.981              |
| 110       | miR-206  | miR-21   | miR-202  | miR-219B | 0.979            | 0.973              |
| 111       | miR-206  | miR-6875 | miR-202  | miR-219B | 0.982            | 0.972              |
| 112       | miR-24   | miR-373  | miR-21   | miR-6875 | 0.991            | 0.992              |
| 113       | miR-24   | miR-373  | miR-21   | miR-202  | 0.988            | 0.988              |
| 114       | miR-24   | miR-373  | miR-21   | miR-219B | 0.989            | 0.988              |
| 115       | miR-24   | miR-373  | miR-6875 | miR-202  | 0.991            | 0.985              |
| 116       | miR-24   | miR-373  | miR-6875 | miR-219B | 0.991            | 0.983              |
| 117       | miR-24   | miR-373  | miR-202  | miR-219B | 0.986            | 0.974              |
| 118       | miR-24   | miR-21   | miR-6875 | miR-202  | 0.993            | 0.989              |

Table SIII. Continued.

| Biomarker | 1       | 2        | 3        | 4        | Training set AUC | Validation set AUC |
|-----------|---------|----------|----------|----------|------------------|--------------------|
| 119       | miR-24  | miR-21   | miR-6875 | miR-219B | 0.993            | 0.989              |
| 120       | miR-24  | miR-21   | miR-202  | miR-219B | 0.99             | 0.981              |
| 121       | miR-24  | miR-6875 | miR-202  | miR-219B | 0.991            | 0.981              |
| 122       | miR-373 | miR-21   | miR-6875 | miR-202  | 0.974            | 0.977              |
| 123       | miR-373 | miR-21   | miR-6875 | miR-219B | 0.977            | 0.98               |
| 124       | miR-373 | miR-21   | miR-202  | miR-219B | 0.971            | 0.968              |
| 125       | miR-373 | miR-6875 | miR-202  | miR-219B | 0.968            | 0.964              |
| 126       | miR-21  | miR-6875 | miR-202  | miR-219B | 0.978            | 0.966              |
